# Supplementary material for: Supercooled liquid water and secondary ice production in Kelvin–Helmholtz instability as revealed by radar Doppler spectra observations
Source: Copernicus journal article supplement (doi:10.5194/acp-2021-338), 2021-06-09
Supplement: Supplementary file [file acp-2021-338-AC1-supplement.pdf]

## Reviewer #1

The authors investigated the origins of supercooled liquid water and secondary ice in a stratiform precipitation event. Vertically pointing C-band and W-band radars at the Hyytiälä station, scanning C-band weather radar at Ikaalinen, and sounding at Jokioinen, provide rich information of the microphysical and dynamical properties of the mixed-phase layer embedded in the stratiform precipitation system. Radar doppler moments (reflectivity, linear depolarization ratio, Doppler velocity and spectral width) are used to explore cloud dynamics (turbulent layer and wind shear) and identify various hydrometer types (including supercooled cloud droplets, newly-formed ice columns, and background ice). Path integrated attenuation from the C/W dual-wavelength observations also provide an estimation of supercooled liquid water path. Valuable data and careful analysis provide physical insights of the formation of supercooled liquid water and secondary ice production due to a turbulent layer caused by Kelvin-Helmholtz instability: (1) Shear leads to the formation of the Kelvin-Helmholtz instability; (2) Drizzle forms in the K-H billows due to isobaric mixing; (3) Secondary ice forms in the K-H billows due to either the Hallett-Mossop process or droplet breakup during freezing, or both. The manuscript is well written, and results are quite convincing. I suggest the publication of this paper in ACP with only some minor comments below:

We sincerely appreciate the reviewer for the positive comments on our paper. We have amended the manuscript as suggested. Please see below our response to your comments.

1. Figure 4: Blank regions in the Figure (e.g., above 2.8 km at 20:55 UTC) are when liquid cloud droplet mode does not exist in Doppler spectrum? Please state it clearly in the text or caption.

Thank you for the very good suggestion. We have added the following text in the caption:

*Blank regions in (a, b, c and e) are where no significant supercooled liquid mode (a, b, c) or columnar ice mode (e) can be identified in radar Doppler spectrum.*

2. Page 14, Line 13-14: "To assess the back trajectory of ice crystals, a simulation of free-falling growing ice columns was performed." Please provide more details (e.g., literature, equations) of the ice particle growth model.

In the revised manuscript, we have added the information about the ice particle growth model in appendix.

3. Page 14, Line 23: " $N = \text{mass}/\text{IWC}$ ". Should it be " $N = \text{IWC}/\text{mass}$ "?

Corrected.
